1     **Screening Avian Pathogens in Eggs from Commercial Hatcheries in**  
2             **Nepal- an Effective Poultry Disease Surveillance Tool**

3     Shreeya Sharma<sup>1#</sup>, Kavya Dhital<sup>1,2#</sup>, Dhiraj Puri<sup>1</sup>, Saman Pradhan<sup>1,2</sup>, Udaya Rajbhandari<sup>1</sup>, Amit Basnet<sup>1</sup>,  
4     Sajani Ghaju<sup>1</sup>, Prajwol Manandhar<sup>2</sup>, Nabin U Ghimire<sup>3</sup>, Manoj K Shahi<sup>4</sup>, Ajit Poudel<sup>1,2</sup>, Rajindra Napit<sup>1,2</sup>,  
5     Dibesh Karmacharya<sup>1,2,5\*</sup>

6     <sup>1</sup>Poultry Diagnostic Division, BIOVAC Nepal Pvt. Ltd., Nala, Banepa, Nepal

7     <sup>2</sup>One Health Division, Center for Molecular Dynamics Nepal, Kathmandu, Nepal

8     <sup>3</sup>Veterinary Standards and Drug Regulatory Laboratory, Department of Livestock Services, Nepal

9     <sup>4</sup>Nepal Veterinary Council, Kathmandu, Nepal

10    <sup>5</sup>School of Biological Sciences, the University of Queensland, Australia

11    #these authors contributed equally

12    \*Corresponding author

13    E-mail: [dibesh@biovacnepal.com](mailto:dibesh@biovacnepal.com); [dibesh@cmdn.org](mailto:dibesh@cmdn.org)

14

15

16

## 17 **Abstract**

### 18 **Background**

19 Commercial hatcheries play an important role in the overall poultry value chain- providing small to large  
20 poultry farmers with day old chicks. Any outbreak in such hatcheries can spread diseases to other farms.  
21 Regular screening of major avian pathogens, along with strict bio-security measures, can prevent spread of  
22 diseases in hatcheries. Newcastle Disease Virus (NDV), Infectious Bronchitis Virus (IBV), *Mycoplasma*  
23 *gallisepticum* (MG), *Mycoplasma synoviae* (MS), Infectious Bursal Disease Virus (IBDV) and Influenza A  
24 Virus (IAV) are among the most prevalent poultry diseases which can be detected in egg albumin.

### 25 **Method**

26 We retrospectively (August 2020- August 2021, except October 2020) analyzed diagnostic results for six  
27 selected avian pathogens (NDV, IBV, MS, MG, IBDV and IAV) on eggs (n=4343) received from eleven  
28 major commercial poultry hatcheries located in the five adjoining districts of Kathmandu, Nepal. Albumin  
29 from 10% randomly selected eggs from each hatchery were tested for the six avian pathogens using  
30 multiplex PCR.

### 31 **Result**

32 Majority (7/11, 64%) of the poultry hatcheries had at least one of the six pathogens present. We detected at  
33 least one avian pathogen in nine out of eleven months (82%) of screening. Except for IBDV, we found one  
34 or more of the other major avian pathogens- Influenza A (IAV) (n=4 times) and *Mycoplasma gallisepticum*  
35 (MG) (n=4 times) were detected the most, followed by Newcastle Virus (NDV) (n=3 times). Infectious  
36 bronchitis virus (IBV) were detected twice, and *Mycoplasma synoviae* (MS) was detected once.

### 37 **Conclusion**

38 In a resource strapped country like Nepal, poultry disease outbreak investigation in particular and  
39 surveillance in general are challenging. Meanwhile, poultry production is highly impacted by disease  
40 outbreaks often triggered by poor bio-security and lack of pathogen screening practices. Our molecular  
41 screening tests have picked up major poultry pathogens present throughout the year in eggs collected from  
42 hatcheries. Influenza A was detected at 4 different incidences throughout the year, which is of concern to  
43 both human and animal health. Quick systematic screening of eggs at key distribution points (hatcheries)  
44 for major avian pathogens is an effective surveillance tool for early disease detection and containment of  
45 outbreaks.

46 **Keywords:** eggs, avian pathogens, disease screening, surveillance, poultry health

## 47 **Introduction**

48 Globally, the poultry sector is a sizeable industry with a current market value of \$ 310.7 billion and is  
49 expected to grow at a compound annual growth rate (CAGR) of 3.8%<sup>1</sup>. Poultry is a rapidly growing  
50 agricultural sub-sector in developing countries<sup>2</sup>, however, product quality, safety, and avian diseases  
51 continue to be a major challenge to this industry<sup>3</sup>.

52 Hatcheries occupy a focal position in the poultry production chain, connecting with multiple flocks<sup>4</sup>,  
53 thereby acting as a reservoir, linkage and source of pathogenic microorganisms<sup>5</sup>. Nepal's \$240-million  
54 poultry industry<sup>6</sup> is buttressed by 21,956 poultry farms present in sixty four out of seventy five districts,  
55 where 325 total commercial hatcheries represent this burgeoning industry<sup>7</sup>.

56 Animal trade related movement of poultry and poultry products from production sites, such as hatcheries,  
57 can influence disease transmission dynamics into uncontaminated flocks<sup>8</sup>. For example, transmission of a  
58 recent subtype of Avian Influenza virus in Bangladesh was associated with poultry movement<sup>9</sup>.

59 Several pathogens (both mono and multi-causal) have been implicated as probable causes of avian diseases.  
60 Poultry can be infected or colonized with other potential organism via eggs<sup>3</sup>. Contaminated eggs can be a  
61 source of infection and a vehicle for transmission of pathogens<sup>10, 11</sup>. Contamination can occur horizontally  
62 through egg shells<sup>12</sup> or vertically before oviposition stemming from infection of reproductive organs<sup>13</sup>. In  
63 vertical/ trans-ovarian route, the disease is ascendingly transmitted from laying hen to its progenies- where  
64 the yolk, albumen and membranes are contaminated via the reproductive organs<sup>14</sup> before the eggs are  
65 covered by shell in the uterus. Handling fecal material, dust, and dirt can contaminate eggs in hatcheries  
66 through horizontal route. Extrinsic factors such as temperature, moisture, shell characteristics and  
67 membrane properties are attributable to pathogen transmission<sup>15</sup>.

68 Eggs form as great a proportion of the animal protein diet for Low and Middle Income Countries (LMICs),  
69 overlooking a projected 76.6%<sup>16</sup> growth in egg production. Egg production is imperative to the growing  
70 population for providing an inexpensive source of protein<sup>17</sup>, thereby contributing to food security. Global  
71 egg production continues to see substantial growth from 61.7 tons to 76.7 tons<sup>18</sup>, a 24% increase in the past  
72 decade. Asia is the largest egg producing region, contributing to 60% of the total production volume<sup>16</sup>.

73 Avian pathogens can cause huge economic loss (>20%) in the overall poultry production, and three times  
74 due to loss from mortality<sup>19, 20</sup>. Egg and egg based product surveillance programs are highly effective in  
75 controlling foodborne disease outbreaks- often providing information for timely intervention, control and  
76 mitigation measures<sup>21, 22, 23</sup>. Egg-based surveillance helped identify more than 895 foodborne disease  
77 outbreaks in Spain (2000-2002), majority (85%) caused by *Salmonella*<sup>24</sup>.

78 Most studies have focused on detecting of foodborne pathogens like *Salmonella* spp., *Camphylobacter* spp.  
79 and *Escherichia coli* in eggshells<sup>26,27,28</sup>, we posit that albumin-based screening is also a convenient tool and  
80 useful in detecting other important avian pathogens such as- *Mycoplasma gallisepticum* (MG), *Mycoplasma*  
81 *synoviae* (MS), Infectious Bronchitis Virus (IBV), Influenza A Virus (IAV), Newcastle Disease Virus  
82 (NDV) and Infectious Bursal Disease Virus (IBDV) in hatcheries to minimize contamination through  
83 horizontal and vertical transmission modes. Avian pathogens have been isolated from oral swabs, cloacal  
84 swabs, serum samples, egg yolk, egg shells, and environmental swabs but albumin-based molecular  
85 detection has not been intensively used till date. Due to the dearth of literature available on albumin  
86 screening, we used Polymerase Chain Reaction (PCR) based tests to screen for six major avian pathogens  
87 (IBD, IBDV, MS, MG, IAV and NDV) in egg albumin from eggs collected from eleven hatcheries, hence  
88 devising cost-effective poultry pathogen surveillance tool in hatcheries.

## 89 **Selected Avian Diseases**

### 90 ***Mycoplasma synoviae* and *Mycoplasma gallisepticum***

91 *Mycoplasma* is a vertically transmitted disease<sup>29</sup> with pronounced effects in eggshell- altered surface,  
92 thinning, translucency, consequently leading to a greater incidence of eggshell cracks and breaks<sup>30</sup>. Though  
93 it is a non-fatal disease<sup>31</sup>, it can significantly affect weight gain, feed conversion ratio, fertility, chronic  
94 respiratory disease and hatchability<sup>32, 33</sup> in birds. MG and MS are bacterial OIE-listed respiratory  
95 pathogens<sup>34</sup> which often persist in sub-clinical level<sup>35</sup> and are a key cause for economic loss in the poultry  
96 industry<sup>34</sup>. *Mycoplasma* infections, especially in farms with weak biosecurity, are often the cause of  
97 eggshell abnormalities and decrease in egg production<sup>36</sup>.

### 98 **Newcastle Disease Virus (NDV)**

99 Newcastle disease (ND), an OIE-notifiable List A disease, is caused by avian paramyxovirus serotype 1  
100 (APMV-1) virus<sup>38</sup> of Avulavirus genus. It is one of the highly pathogenic viral diseases of avian species,  
101 and a major cause of morbidity and mortality in flocks<sup>39</sup>. Affected birds develop respiratory, digestive and  
102 neurologic symptoms with profound immunosuppression<sup>40</sup>. In many countries throughout Asia and Africa,  
103 ND remains endemic in commercial poultry despite intensive vaccination program that have been applied  
104 for decades<sup>41</sup>. NDV can replicate in the reproductive tract of hens and contaminate internal components of  
105 eggs and eggshell surface<sup>42</sup>.

106

107 **Infectious Bronchitis Virus (IBV)**

108 Infectious bronchitis in poultry is caused by IBV- an Avian Coronavirus (ACoV) of genus  
109 Gammacoronavirus<sup>43</sup>. IBV causes a fast-spreading respiratory disease in young chicks, with laying hens  
110 experiencing reduced production, egg shell abnormalities, and decreased internal egg quality<sup>44</sup>. Along with  
111 commercial poultry, backyard poultry and free-ranging birds may serve as 'reservoir' for ACoV  
112 transmission, and migratory birds often acting as an intermediary host spreading to wide and distant areas<sup>45</sup>.

113 **Infectious Bursal Disease Virus (IBDV)**

114 Infectious Bursal Disease, commonly known as Gumboro, is an immunosuppressive disease transmitted  
115 mainly horizontally through the feco-oral route<sup>46</sup>. It is caused by a double stranded RNA virus- IBDV  
116 (genus *Avibirnavirus* of family *Birnaviridae*)<sup>47</sup>. There are two distinct serotypes of the virus, but only  
117 serotype 1 viruses cause disease in poultry<sup>48</sup>. Viruses belonging to one of these antigenic subtypes are  
118 commonly known as variants, causing up to 60 to 100 percent mortality rates in chickens<sup>49</sup>.

119 **Influenza A virus (IAV)**

120 Avian Influenza (AI), caused by IAV, is a highly contagious viral infection which may cause up to 100%  
121 mortality in domestic chickens or turkeys<sup>50</sup>. The disease is caused by a highly mutable RNA virus that  
122 belongs to the family *Orthomyxoviridae*<sup>51</sup>. Influenza viruses have two surface proteins, hemagglutinin (HA)  
123 and neuraminidase (NA)<sup>52</sup> that determine their subtype and the animal species they infect; there are 16 HA  
124 and nine NA types<sup>53</sup>. When AI viruses of two HA types, H5 and H7, infect domestic poultry (chickens and  
125 turkeys) they often mutate and virulent disease arises in these birds which is called highly pathogenic avian  
126 influenza (HPAI)<sup>54</sup>. The initial infection that causes subclinical or mild disease is called low pathogenic  
127 avian influenza (LPAI)<sup>55</sup>. Wild water birds act as reservoir hosts of IAV, however these viruses generally  
128 do not cause disease in these birds<sup>56</sup>.

129

## 130 Methodology

131 We retrospectively looked at the data on the presence of 6 major avian pathogens on eggs received  
132 periodically every month (August 20- August 2021, except October 2020) from the eleven major hatcheries  
133 in and around Kathmandu valley. These hatcheries participated in preventive pathogen screening services  
134 provided by the BIOVAC Nepal's Poultry Diagnostic Laboratory (BNPDL). The sampling was performed  
135 by trained personnel. No live animals were harmed and the study does not include handling of animal. No  
136 embryonated eggs were killed during sampling process- qualifying this study to be exempted from any  
137 ethical approval. To maintain anonymity of the hatcheries, they were coded with numeric digits on the basis  
138 of time the samples were received. A total of 4343 eggs from eleven major hatcheries located in the five  
139 surrounding districts (Kathmandu, Bhaktapur, Lalitpur, Kavrepalanchowk and Ramechhap) of Kathmandu,  
140 Nepal were received and tested (Figure 1).

141 These eggs were brought to the BNPDL every month (except October 2020) in batches ( $133\pm 60$  eggs per  
142 batch) packaged in crates (30 eggs per crate). Albumin extracted from 10% random eggs from each batch  
143 (3 eggs from each crate) were tested for six selected Avian pathogens (NDV, IAV, IBV, IBDV, MS and  
144 MG) using PCR (Figure 2)

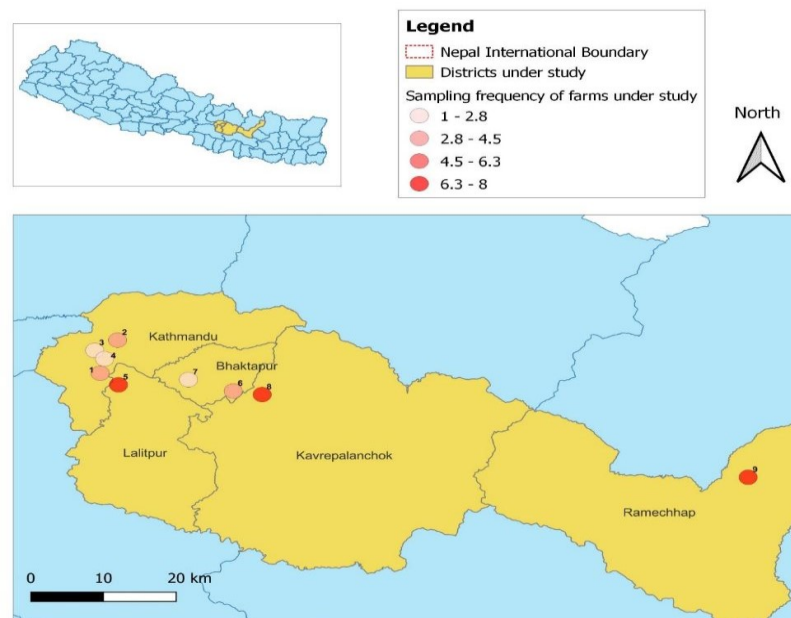

145

146 **Figure 1: Participating eleven major hatcheries located in Kathmandu and surrounding five districts**  
147 *(Kathmandu, Bhaktapur, Lalitpur, Kavrepalanchowk and Ramechhap). As part of preventive disease*  
148 *screening, eggs are routinely received by BIOVAC Nepal's Poultry diagnostic laboratory located in*  
149 *Banepa (Nala), Nepal.*

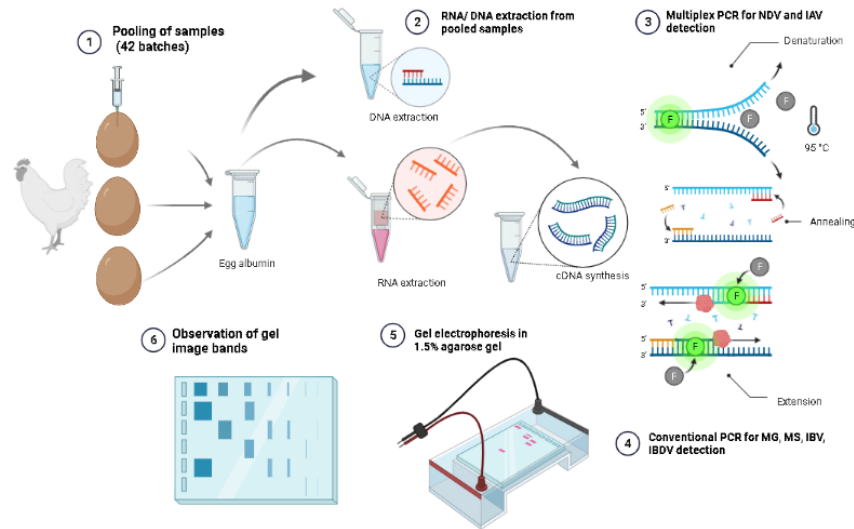

150

151 **Figure 2: Laboratory testing for the detection of six avian pathogens:** *BIOVAC Nepal's Poultry*  
152 *Diagnostic Laboratory (BNPDL) received samples from eleven participating hatcheries for preventive*  
153 *diagnostic screening of avian pathogens.*

154

155

## 156 **Molecular Detection of Six Avian Pathogens**

### 157 **Nucleic Acid Extraction and cDNA synthesis**

158 The nucleic acids (DNA/RNA) from pooled egg albumin samples were extracted using automated nucleic  
159 acid extractor (abGenix™ AITbiotech, Singapore) following manufacturer's instructions. cDNA for the  
160 extracted nucleic acids were synthesized using iScript™ cDNA Synthesis Kit (Bio-Rad Laboratories,  
161 USA). For a single sample, 4 µL of 5X iScript reaction mix, 1 µL of iScript reverse transcriptase, 6 µL of  
162 nuclease free water and 9 µL of the extracted nucleic acid was used to prepare 20 µL of cDNA. The cDNA  
163 was synthesized in thermal cycler by incubating the mix at 25°C for 5 minutes followed by reverse  
164 transcription at 46°C for 20 minutes and RT inactivation at 95°C for 1 minute. PCR for IBV, IBD, MG and  
165 MS were performed using QIAGEN Multiplex PCR Kit (Qiagen, Catalog No. 206145). Multiplex PCR  
166 was used to detect IAV and NDV simultaneously in the samples using QIAGEN Multiplex PCR kit.

167

168

## 169 **Multiplex PCR for IAV and NDV**

170 We have developed and optimized a multiplex PCR that detects both IAV and NDV simultaneously in one  
171 single test. A 291 bp fragment of Matrix protein gene of NDV and 156 bp fragment of Matrix protein gene  
172 of IAV was amplified in 25 µL of the reaction mixture containing: 3 µL of cDNA, 5 µL QIAGEN®  
173 nuclease-free water, 2.5 µL of 5X Q Solution, 0.5 µL NDV primer (forward), 0.5 µL NDV primer (reverse),  
174 0.5 µL IAV primer (forward), 0.5 µL IAV primer (reverse) and 12.5 µL of 2X of QIAGEN® Multiplex  
175 PCR Master Mix (HotStarTaq DNA Polymerase, MgCl<sub>2</sub>, dNTPs and PCR buffer). PCR condition: 1 cycle  
176 of initial denaturation at 95°C for 15 minutes, 45 cycles of denaturation at 95°C for 20 seconds, annealing  
177 at 60°C for 20 second and extension at 72°C for 30 second. The PCR ended with a final elongation at 72°C  
178 for 5 minutes. PCR products were visualized in Gel electrophoresis (1.5%) (Figure 3).

## 179 **PCR Primers- multiplex IAV and NDV**

180 For NDV, 10 pico-molar concentration each of forward primer (5'-GCTCAATGTCACTATTGATGTGG-  
181 3') and reverse primer (5'-TAGCAGGCTGTCCCACTGC-3') were used and for IAV, 10 pico-molar  
182 concentration each of forward (5'-CTTCTAACCGAGGTTCGAAACG-3') and reverse  
183 (5'GGTGACAGGATTGGTCTTGTC-3') were designed using NCBI PrimerBlast®.

## 184 **PCR detection of IBV**

185 A 433 bp fragment of 3' UTR of IBV was amplified in 25 µL of the reaction mixture containing: 2 µL of  
186 template cDNA, 8.5 µL QIAGEN® nuclease-free water, 1 µL All 1-F primer (forward), 1 µL Dell-R primer  
187 (reverse) and 12.5 µL of 2X of QIAGEN® PCR Master Mix. PCR condition: 1 cycle of initial denaturation  
188 at 95°C for 15 minutes, 35 cycles of denaturation at 95°C for 30 seconds, annealing at 57°C for 30 second  
189 and extension at 72°C for 40 second. The PCR ended with a final elongation at 72°C for 5 minutes.

## 190 **PCR Primers- IBV**

191 10 pico-molar concentration of each All 1-F forward primer (5'-CAGCGCCAAAACAACAGCG-3) and  
192 Dell-R reverse primer (5'-CATTTCCCTGGCGATAGAC-3') were used for detection of IBV as per Saba  
193 et al. (2014)<sup>57</sup>.

## 194 **PCR detection of IBDV**

195 A 643 bp fragment of complete hyper variable region of VP2 gene of IBDV was amplified in 25 µL of the  
196 reaction mixture containing 2 µL of template cDNA, 8.5 µL QIAGEN® nuclease-free water, 1 µL  
197 Infectious Bursal Disease Forward Primer, 1µL Infectious Bursal Disease Forward Primer and 12.5 µL of  
198 2X of QIAGEN® PCR Master Mix. PCR conditions: 1 cycle of initial denaturation at 95°C for 15 minutes,



199 35 cycles of denaturation at 95°C for 30 seconds, annealing at 53°C for 20 second and extension at 72°C  
200 for 45 second. The PCR ended with a final elongation at 72°C for 5 minutes.

#### 201 **PCR Primers- IBDV**

202 10 pico-molar concentration of each forward primer (5'-TCACCGTCCTCAGCTTAC-3') and reverse  
203 primer (5'-TCAGGATTTGGGATCAGC-3') were used for the detection of IBD as per Kataria et al.  
204 (2007)<sup>58</sup>.

#### 205 **PCR detection of MS**

206 A 207 bp fragment of 16s rRNA gene of MS was amplified in 25 µL of the reaction mixture containing 2  
207 µL of template cDNA, 8.5 µL QIAGEN® nuclease-free water, 1 µL *Mycoplasma synoviae* forward primer,  
208 1 µL *Mycoplasma synoviae* reverse primer, and 12.5 µL of 2X of QIAGEN® PCR Master Mix. PCR  
209 conditions: 1 cycle of initial denaturation at 95°C for 15 minutes, 35 cycles of denaturation at 95°C for 30  
210 seconds, annealing at 53°C for 20 second and extension at 72°C for 15 second. The PCR ended with a final  
211 elongation at 72°C for 5 minutes.

#### 212 **PCR Primers-MS**

213 10 pico-molar concentration of each forward primer (5'-GAGAAGCAAAATAGTGATATC-3') and  
214 reverse primer (5'-TCGTCTCCGAAGTTAACAA-3') were used for detection of MS as per Kahya et al.  
215 (2015)<sup>59</sup>.

#### 216 217 **PCR detection of MG**

218 A 185 bp fragment of 16s rRNA gene of MG was amplified in 25 µL of the reaction mixture containing 2  
219 µL of template cDNA, 8.5 µL QIAGEN® nuclease-free water, 1 µL *Mycoplasma gallisepticum* forward  
220 primer, 1 µL *Mycoplasma gallisepticum* reverse primer and 12.5 µL of 2X of QIAGEN® PCR Master Mix.  
221 PCR conditions: 1 cycle of initial denaturation at 95°C for 15 minutes, 35 cycles of denaturation at 95°C  
222 for 30 seconds, annealing at 53°C for 20 second and extension at 72°C for 15 second. The PCR ended with  
223 a final elongation at 72°C for 5 minutes.

#### 224 **PCR Primers- MG**

225 10 pico-molar concentration each of forward primer (5'-GAGCTAATCTGTAAAGTTGGTC-3') and  
226 reverse primer (5'-GCTTCCTTGCGGTTAGCAAC-3') were used for detection of MG as per Kahya et. al.  
227 (2015).

228 All PCR amplified products were visualized under 1.5% agarose gel electrophoresis.

229

## 230 Results

231 We retrospectively looked at the data on the presence of 6 major avian pathogens on eggs received  
232 periodically every month (August 20- August 2021, except October 2020) from the eleven major hatcheries  
233 in and around Kathmandu valley. These hatcheries participated in preventive pathogen screening services  
234 provided by BNPD. The hatcheries had experienced high morbidity and mortality in their birds; and had  
235 seen decreased and defective egg production.

236 In an average we received 430 eggs every month from one or more of the eleven hatcheries, majority (7/11,  
237 64%) had at least one of the six pathogens present. We detected at least one avian pathogen in nine out of  
238 eleven months (82%) of screening. Except for IBDV, we found one or multiple occurrence of other major  
239 avian pathogens- Influenza A (IAV) (n=4 times) and *Mycoplasma gallisepticum* (MG) (n=4 times) were  
240 detected the most, followed by Newcastle Virus (NDV) (n=3 times). Infectious bronchitis virus (IBV) were  
241 detected twice, and *Mycoplasma synoviae* (MS) was detected once (Table 1).

242 In hatchery 4, we detected IAV in samples received in two separate months (September and December  
243 2020). Meanwhile, we received most consecutive samples from hatchery 9, where we detected MG 3  
244 months in a row (April, May and June 2021), with multiple pathogens (MG, IAV and NDV) present in June  
245 2021.

246 In the winter season (January- April 2021), four batches had four detectable pathogens (NDV, IBV, MS  
247 and MG). In rainy or wet season (May- August 2021), three different pathogens (IAV, MG and NDV) were  
248 found in the 9 batches; during this period MG was detected in three consecutive batches. During the fall  
249 season (September-December), we detected only three pathogen (NDV, IBV and IAV) in four batches. We  
250 detected more pathogens during rainy or wet season than in winter or fall season (Figure 4).

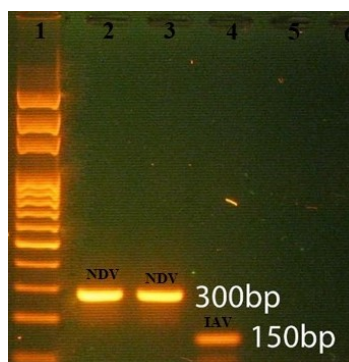

251  
252 **Figure 3: Detection of Influenza A (IAV) and Newcastle Disease Virus (NDV) using Multiplex PCR:**  
253 Newcastle Disease Virus (NDV) is detected as 300bp PCR amplicon, and Influenza A Virus (IAV) as  
254 150bp. Lane 1: DNA ladder; Lanes 2-5: pooled albumin samples, Lane 6: negative control. Visualized  
255 under 1.5% gel electrophoresis.

256 **Table 1: Eggs received and avian pathogen detected**  
 257 **from each hatchery:** *Between Aug 2020 through*  
 258 *August 2021 (except October 2020), we received eggs*  
 259 *from participating 11 major poultry hatcheries. Eggs*  
 260 *received from some hatcheries (1, 2, 3 and 7) were free*  
 261 *of screened avian pathogens. Influenza A (IAV) (n=4*  
 262 *times) and Mycoplasma gallisepticum (MG) (n=4*  
 263 *times) were detected the most, followed by Newcastle*  
 264 *Virus (NDV) (n=3 times). Infectious bronchitis virus*  
 265 *(IBV) were detected twice, and Mycoplasma synoviae*  
 266 *(MS) was detected once.*

267

| HATCHERY | Months |              |        |                  |              |                |        |            |             |                       |             |               |
|----------|--------|--------------|--------|------------------|--------------|----------------|--------|------------|-------------|-----------------------|-------------|---------------|
|          | Aug 20 | Sep 20       | Nov 20 | Dec 20           | Jan 21       | Feb 21         | Mar 21 | Apr 21     | May 21      | Jun 21                | Jul 21      | Aug 21        |
| 1        | N=260  |              |        |                  |              |                |        |            |             |                       |             |               |
| 2        | N=120  |              |        |                  |              |                |        |            |             |                       |             |               |
| 3        |        | N= 450       |        |                  |              |                |        |            |             |                       |             |               |
| 4        |        | N=150<br>IAV |        | N=120<br>IAV/IBV |              |                |        |            |             |                       |             |               |
| 5        |        |              | N= 60  | N=240<br>NDV     |              |                |        |            |             |                       |             |               |
| 6        |        |              |        |                  | N=420<br>NDV |                |        |            |             |                       |             |               |
| 7        |        |              |        |                  |              | N=60           | N=210  |            |             |                       |             |               |
| 8        |        |              |        |                  |              | N=27<br>MS IBV |        |            |             |                       |             |               |
| 9        |        |              |        |                  |              |                | N=65   | N=30<br>MG | N=180<br>MG | N=300<br>MG, NDV, IAV | N=418       |               |
| 10       |        |              |        |                  |              |                |        |            | N=10        | N=270                 | N=870<br>MG |               |
| 11       |        |              |        |                  |              |                |        |            |             |                       | N=90        | N=1050<br>IAV |

268

269

270

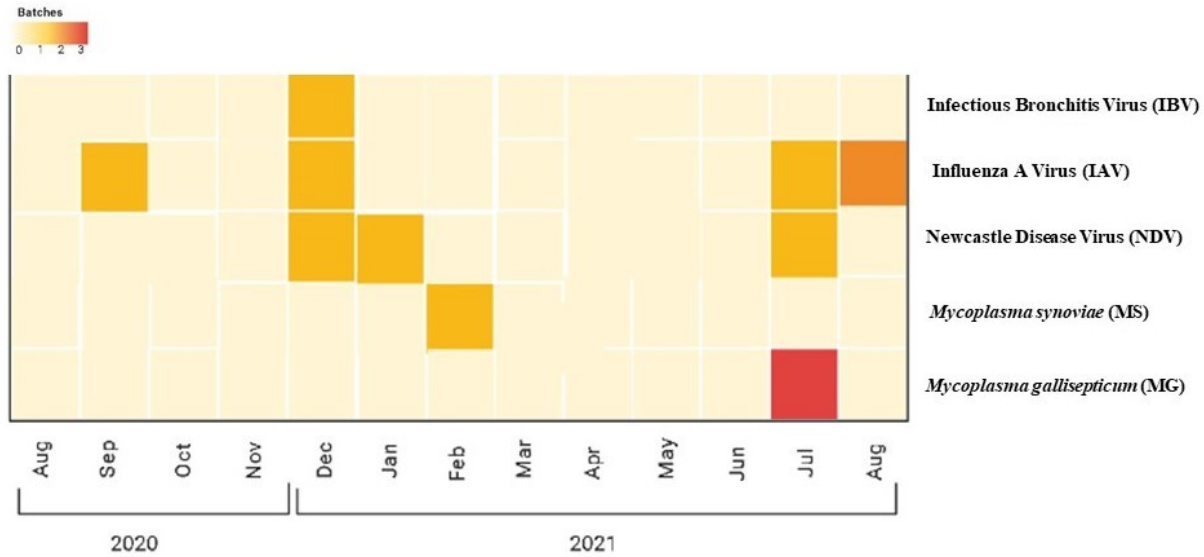

271

272 **Figure 4: Detected avian pathogens in received batches from the eleven different hatcheries:** *In the*  
273 *winter season (January- April 2021), four batches had four detectable pathogens (NDV, IBV, MS and MG).*  
274 *In rainy or wet season (May- August 2021), three different pathogens (IAV, MG and NDV) were found in*  
275 *the 9 batches; during this period MG was detected in three consecutive batches. During the fall season*  
276 *(September-December), we detected only three pathogen (NDV, IBV and IAV) in four batches. We detected*  
277 *more pathogens during rainy or wet season than in winter or fall season (Figure 3).*

278

279

280

## 281 **Discussion**

282 There is no active surveillance of most of the avian pathogens in Nepal, only outbreak related Avian  
283 Influenza (Bird flu) is investigated<sup>60, 61</sup> primarily due to human health concerns. Meanwhile, disease  
284 outbreaks in poultry farms are often reported based on clinical symptoms and mortality. Lack of  
285 comprehensive animal diagnostic facilities also limits the farmers' ability to have disease outbreaks  
286 properly investigated. Preventive disease screening is still a novel concept in Nepal's poultry industry.  
287 Against that backdrop, we have set up a poultry disease diagnostic laboratory (BNPDL) based in  
288 Kathmandu and Nala, Nepal. We routinely receive requests to screen for avian pathogens from poultry  
289 farmers, including hatcheries. Hatcheries can be a source of disease spread through contaminated eggs and  
290 day old chicks. We have detected presence of avian pathogens in egg albumin using molecular (PCR)  
291 detection. In a resource strapped country like Nepal, where disease surveillance is not well developed, a  
292 routine egg screening based on accurate and relatively fast PCR screening, can offer an important insight  
293 into floating avian pathogens in poultry population at any given time. This kind of information can be  
294 helpful for poultry producers, including hatcheries, to prevent and mitigate their losses by adopting  
295 appropriate interventions.

### 296 **Egg-shell based pathogen detection**

297 There are some egg-shell based poultry disease surveillance program being used in some countries,  
298 however, they have only focused on food borne pathogens such as *Salmonella*, *Camphylobacter* and  
299 *Escherichia coli*<sup>62,63,64,65</sup>. Majority (41%) of all foodborne disease outbreaks in Spain were associated with  
300 consumption of eggs and egg products<sup>66</sup>, which explains a high level of contamination associated with eggs.  
301 Similarly, quarterly surveillance measures have also been carried out under the Egg Product Inspection Act  
302 (EPIA) as part of USDA's Shell Egg Surveillance (SES)<sup>67</sup>. While successful in detecting these important  
303 food safety related pathogens, such surveillance completely overlooks the poultry health related pathogens-  
304 especially avian viral pathogens. We have demonstrated that egg (albumin) based screening and disease  
305 surveillance can be pretty effective in picking floating pathogens, and help us understand the disease  
306 burden, patterns and trends in general.

### 307 **Limitation of our study**

308 This study was based on and relied upon the eggs being provided by the participating hatcheries. Most of  
309 these hatcheries only requested to have their eggs screened based on suspected clinical signs (and often  
310 after some mortality). Hence, they did not provide eggs routinely and regularly. Because of this, we were  
311 not able to establish the real disease occurrence trend across each hatchery nor were we able to tell whether  
312 the de-contamination efforts they made actually worked. Furthermore, randomly selecting 10% of the eggs

313 might not have the sensitivity needed to pick all the pathogens in a given farm; we only screened a fraction  
314 of eggs in each batch due to cost consideration. We could have integrated an environmental screening and  
315 bio-security assessment as a part of a thorough disease surveillance system in poultry industry/farms,  
316 however, we were not able to do that in this study. Interestingly, we did observe some seasonal variability  
317 of disease occurrences- wet or rainy season harboring more pathogens than dry season. However, we need  
318 more data points to look into this further.

### 319 **Implications and Utility of Egg based Pathogen screening**

320 Molecular detection of pathogens in egg albumin can provide important information to put together an early  
321 containment strategies for poultry farmers in particular and animal health efforts in general. It can be  
322 especially beneficial to hatcheries as they are often the contamination source- spreading disease from egg  
323 to day-old chicks, and eventually to the whole poultry production value chain. Egg-based disease screening  
324 can be an effective One Health surveillance tool as well, as it can pick up important Zoonotic pathogens  
325 such as Influenza A, and help stem pathogen spill-overs, thereby safeguarding human health. Albumin  
326 screening, as an early detection tool, can also assess biosecurity effectiveness in hatcheries and help curb  
327 horizontal and vertical transmission of avian diseases. In a developing country like Nepal, where resources  
328 are limited, easy to access pathogen screening samples like eggs and highly sensitive and accurate  
329 molecular (PCR) tools can help in building important avian disease surveillance tool. With the advent of  
330 next generation DNA sequencing and Genomics technology, we can even screen for a broader viral,  
331 bacterial and other pathogens using same (single) sample source. High throughput in data acquisition made  
332 possible by such new technologies certainly can make disease surveillance fast, easy and affordable. Our  
333 study is an initial step towards that direction.

334

335

336

337

338

339

340

341

342

343

344

345

346 **Acknowledgement**

347 We would like to thank the participating hatcheries for their contribution in this important study. Our  
348 gratitude also goes to the experts from the Intrepid Nepal Pvt. Ltd. and the Center for Molecular Dynamics  
349 Nepal (CMDN) for their help with the Genomics analysis. And finally, a big thank you to the Poultry  
350 Association of Nepal for their continued support.

351

352

353

354

355 **Author Contributions**

356 Conceptualization: Rajindra Napit

357 Data curation: Shreeya Sharma, Kavya Dhital, Sajani Ghaju, Prajwol Manandhar

358 Field support: Dhiraj Puri

359 Laboratory analysis: Kavya Dhital, Sajani Ghaju, Udaya Rajbhandari, Amit Basnet

360 Methodology: Rajindra Napit, Shreeya Sharma

361 GIS Map: Prajwol Manandhar

362 Supervision: Rajindra Napit, Dibesh Bikram Karmacharya

363 Validation: Dibesh Bikram Karmacharya

364 Writing – original draft: Shreeya Sharma

365 Writing – review & editing: Dibesh Bikram Karmacharya

366

367

368 **REFERENCES**

- 369 1. Yildiz D. Global Poultry Industry and Trends. 2021 Mar 11 [cited 12 Jul 2022]. In: Feed and  
370 Additive Magazine [Internet]. Available from: [https://www.feedandadditive.com/global-poultry-](https://www.feedandadditive.com/global-poultry-industry-and-trends/#:~:text=The%20poultry%20sector%2C%20which%20has%20a%20market%20value%20of%20%24%20310.7,with%20a%20CAGR%20of%207%25)  
371 [industry-and-](https://www.feedandadditive.com/global-poultry-industry-and-trends/#:~:text=The%20poultry%20sector%2C%20which%20has%20a%20market%20value%20of%20%24%20310.7,with%20a%20CAGR%20of%207%25)  
372 [trends/#:~:text=The%20poultry%20sector%2C%20which%20has%20a%20market%20value%20](https://www.feedandadditive.com/global-poultry-industry-and-trends/#:~:text=The%20poultry%20sector%2C%20which%20has%20a%20market%20value%20of%20%24%20310.7,with%20a%20CAGR%20of%207%25)  
373 [of%20%24%20310.7,with%20a%20CAGR%20of%207%25](https://www.feedandadditive.com/global-poultry-industry-and-trends/#:~:text=The%20poultry%20sector%2C%20which%20has%20a%20market%20value%20of%20%24%20310.7,with%20a%20CAGR%20of%207%25).  
374
- 375 2. Mottet A, Tempio G. Global poultry production: current state and future outlook and challenges.  
376 *World's Poultry Science Journal* 2017; 73(2):1-12.  
377
- 378 3. Hafez HM, Attia YA. Challenges to the Poultry Industry: Current Perspectives and Strategic Future  
379 After the COVID-19 Outbreak. *Front Vet Sci.* 2020 Aug 26;7:516.  
380
- 381 4. Elhadidy M. Poultry hatcheries as potential reservoirs for antimicrobial-resistant *Escherichia coli* :  
382 A risk to public health and food safety. *Scientific Reports* 2018; 8(1)  
383
- 384 5. Wales A, Davies R. Review of hatchery transmission of bacteria with focus on *Salmonella*, chick  
385 pathogens and antimicrobial resistance. *World's Poultry Science Journal* 2020; 76 (3).  
386
- 387 6. Strengthening Critical Segments of the Poultry Supply Chain. International Finance Corporation.  
388 [Cited 2022 July 12]. Available from: [https://www.ifc.org/wps/wcm/connect/b226e65c-79a9-](https://www.ifc.org/wps/wcm/connect/b226e65c-79a9-42b2-b666-2327437c3edb/NepalPoultry.pdf?MOD=AJPERES&CVID=kqMoqDK)  
389 [42b2-b666-2327437c3edb/NepalPoultry.pdf?MOD=AJPERES&CVID=kqMoqDK](https://www.ifc.org/wps/wcm/connect/b226e65c-79a9-42b2-b666-2327437c3edb/NepalPoultry.pdf?MOD=AJPERES&CVID=kqMoqDK)  
390
- 391 7. Nepal commercial poultry survey 2071/72. Central Bureau of Statistics 2016. Available from:  
392 <https://cbs.gov.np/nepalcommercial-poultry-survey-2071-072/>  
393
- 394 8. Yoo DS, Chun BC, Kim Y, Lee KN, Moon OK. Dynamics of inter-farm transmission of highly  
395 pathogenic avian influenza H5N6 integrating vehicle movements and phylogenetic information.  
396 *Sci Rep.* 2021;11(1):24163.  
397
- 398 9. Parvin R, Nooruzzaman M, Kabiraj CK, Begum JA, Chowdhury EH, Islam MR, Harder T.  
399 Controlling Avian Influenza Virus in Bangladesh: Challenges and Recommendations. *Viruses.*  
400 2020 Jul 12;12(7):751.  
401
- 402 10. Humphrey TJ. Contamination of eggs with potential human pathogens. In: Board, RG, Fuller R.  
403 *Microbiology of the Avian Egg* 2004. Springer, Boston, MA.  
404
- 405 11. Gantois I, Ducatelle R, Pasmans F, Haesebrouck F, Gast R, Humphrey TJ, Immerseel FV,  
406 Mechanisms of egg contamination by *Salmonella Enteritidis*. *FEMS Microbiology Reviews* 2009;  
407 33(4): 718-738.  
408
- 409 12. Pande VV, Devon RL, Sharma P, McWhorter AR, Chousalkar KK. Study of *Salmonella*  
410 *Typhimurium* Infection in Laying Hens. *Front Microbiol.* 2016 Feb 25;7:203.  
411
- 412 13. De Reu K, Rodenburg TB, Grijspeerdt K, Messens W, Heyndrickx M, Tuytens FA, Sonck B,  
413 Zoons J, & Herman L. Bacteriological contamination, dirt, and cracks of eggshells in furnished  
414 cages and noncage systems for laying hens: an international on-farm comparison. *Poultry science*  
415 2009; 88(11), 2442–2448.  
416



- 417 14. Roberts JR, Souillard R, Bertin J. Avian diseases which affect egg production and quality, Food  
418 Science, Technology and Nutrition 2005; 376-393.  
419
- 420 15. Messens W, Grijspeerdt K, Herman L. Eggshell penetration by Salmonella: a review, World's  
421 Poultry Science Journal 2005, 61:1, 71-86  
422
- 423 16. Windhorst HW A projection of egg production until 2030. 2022 Mar 8 [cited 12 Jul 2022]. In:  
424 Zootenica International [Internet]. Available from: [https://zootenicainternational.com/focus-on/a-](https://zootenicainternational.com/focus-on/a-projection-of-egg-production-until-2030/)  
425 [projection-of-egg-production-until-2030/](https://zootenicainternational.com/focus-on/a-projection-of-egg-production-until-2030/)  
426
- 427 17. Walker S, Baum JI. Eggs as an affordable source of nutrients for adults and children living in food-  
428 insecure environments. Nutr Rev. 2022; 80(2):178-186.  
429
- 430 18. Statistical Yearbook. Food and Agriculture Organization 2020. Available from:  
431 <https://www.fao.org/3/cb1329en/CB1329EN.pdf>  
432
- 433 19. Zhuang QY, Wang SC, Li JP, Liu D, Liu S, Jiang WM, Chen, JM. A clinical survey of common  
434 avian infectious diseases in China. Avian diseases 2014; 58(2), 297–302.  
435
- 436 20. Biggs PM (1982). The world of poultry disease. Avian pathology : Journal of the WVPA; 11(2),  
437 281-300.  
438
- 439 21. Klinkenberg D, Thomas E, Artavia FF, Bouma A. Salmonella enteritidis surveillance by egg  
440 immunology: impact of the sampling scheme on the release of contaminated table eggs. Risk Anal.  
441 2011;31(8):1260-1270.  
442
- 443 22. Crespo PS, Hernandez G, Echeita A, Torres T et al. Surveillance of foodborne disease outbreaks  
444 associated with consumption of eggs and egg products: Spain, 2002 – 2003. Eurosurveillance 2005.  
445 Available from: <https://www.eurosurveillance.org/content/10.2807/esw.10.24.02726-en>  
446
- 447 23. Using indicator-and event-based surveillance to detect foodborne events. World Health  
448 Organization 2017. Available from: [https://www.who.int/docs/default-](https://www.who.int/docs/default-source/documents/publications/using-indicator-and-event-base-surveillance-to-detect-foodborne-events-9789241513241-eng.pdf?sfvrsn=8e8fe021_2)  
449 [source/documents/publications/using-indicator-and-event-base-surveillance-to-detect-foodborne-](https://www.who.int/docs/default-source/documents/publications/using-indicator-and-event-base-surveillance-to-detect-foodborne-events-9789241513241-eng.pdf?sfvrsn=8e8fe021_2)  
450 [events-9789241513241-eng.pdf?sfvrsn=8e8fe021\\_2](https://www.who.int/docs/default-source/documents/publications/using-indicator-and-event-base-surveillance-to-detect-foodborne-events-9789241513241-eng.pdf?sfvrsn=8e8fe021_2)  
451
- 452 24. Whiley H, Ross K. Salmonella and eggs: from production to plate. Int J Environ Res Public Health.  
453 2015 Feb 26;12(3):2543-56.  
454
- 455 25. Ayala AJ, Yabsley MJ & Hernandez SM. A Review of Pathogen Transmission at the Backyard  
456 Chicken-Wild Bird Interface. Frontiers in veterinary science 2020, 7, 539925.  
457
- 458 26. Lee M, Seo DJ, Jeon SB, Ok HE, Jung H, Choi C, Chun HS. Detection of Foodborne Pathogens  
459 and Mycotoxins in Eggs and Chicken Feeds from Farms to Retail Markets. Korean J Food Sci  
460 Anim Resour. 2016;36(4):463-8.  
461
- 462 27. Parveen A, Rahman MM, Fakhruzzaman M et al., Asian J. Med. Biol. Res. June 2017, 3(2): 168-  
463 174  
464
- 465 28. Lin Q, Chousalkar KK, McWhorter AR, Khan S. Salmonella Hessarek: An emerging food borne  
466 pathogen and its role in egg safety. Food Control 2021; 125.  
467

- 468 29. Ter Veen C, de Wit JJ, Feberwee A. Relative contribution of vertical, within-farm and between-  
469 farm transmission of *Mycoplasma synoviae* in layer pullet flocks. *Avian Pathol.* 2020;49(1):56-61.  
470
- 471 30. Kursa, O., Pakuła, A., Tomczyk, G. et al. Eggshell apex abnormalities caused by two different  
472 *Mycoplasma synoviae* genotypes and evaluation of eggshell anomalies by full-field optical  
473 coherence tomography. *BMC Vet Res* 15, 1 (2019). <https://doi.org/10.1186/s12917-018-1758-8>  
474 31. Norouzian, H., Farjanikish, G., & Hosseini, H. (2019). Molecular characterisation of  
475 *Mycoplasma*  
476 *gallisepticum* isolates from Iran in the period 2012-2017. *Acta veterinaria Hungarica*, 67(3), 347–  
477 359. <https://doi.org/10.1556/004.2019.036>  
478 32. Landman WJ. Is *Mycoplasma synoviae* outrunning *Mycoplasma gallisepticum*? A viewpoint from  
479 the Netherlands. *Avian pathology : journal of the W.V.P.A* 2014; 43(1), 2–8.  
480
- 481 33. Yadav, J. P., Tomar, P., Singh, Y., & Khurana, S. K. (2021). Insights on *Mycoplasma*  
482 *gallisepticum* and *Mycoplasma synoviae* infection in poultry: a systematic review. *Animal*  
483 *biotechnology*, 1–10. Advance online publication.  
484 <https://doi.org/10.1080/10495398.2021.1908316>  
485
- 486 34. Galluzzo P., Migliore, S., Galuppo, L., Condorelli, L., Hussein, H. A., Licitra, F., Coltraro, M.,  
487 Sallemi, S., Antoci, F., Cascone, G., Puleio, R., & Loria, G. R. (2022). First Molecular Survey  
488 to Detect *Mycoplasma gallisepticum* and *Mycoplasma synoviae* in Poultry Farms in a Strategic  
489 Production District of Sicily (South-Italy). *Animals : an open access journal from MDPI*, 12(8),  
490 962.  
491
- 492 35. Nascimento ER, Pereira VLA, Barreto ML. Avian mycoplasmosis update. *Brazilian Journal of*  
493 *Poultry Science* 2005; 7(1).  
494
- 495 36. Feberwee JJ, Landman WJM. Induction of eggshell apex abnormalities by *Mycoplasma synoviae*:  
496 field and experimental studies, *Avian Pathology* 2009; 38:1, 77-85  
497
- 498 37. Kammon A, Mulatti P, Lorenzetto M, Ferre N, Sharif M, Eldaghayes I, Dayhum A. Biosecurity  
499 and geospatial analysis of mycoplasma infections in poultry farms at Al-Jabal Al-Gharbi region of  
500 Libya. *Open veterinary journal* 2017, 7(2), 81–85.  
501
- 502 38. Rabalski L, Smietanka K, Minta Z, Szewczyk B. Detection of Newcastle disease virus minor  
503 genetic variants by modified single-stranded conformational polymorphism analysis. *BioMed*  
504 *research international* 2014, 632347.  
505
- 506 39. Lamb R, Parks G. *Paramyxoviridae: the viruses and their replication*. *Fields Virology*. 5th  
507 ed. Lippincott Williams & Wilkins 2007; Philadelphia, 1449–1496  
508 40. Ul-Rahman A, Ishaq HM, Raza MA, Shabbir MZ. Zoonotic potential of Newcastle disease virus:  
509 Old and novel perspectives related to public health. *Reviews in medical Virology* 2022; 32(1)  
510
- 511 41. Alexander DJ, Aldous EW, Fuller CM. The long view: a selective review of 40 years of Newcastle  
512 disease research, *Avian Pathology* 2012, 41:4, 329-335  
513
- 514 42. Silva SM, Susta L, Moresco K, Swayne DE. Vaccination of chickens decreased Newcastle disease  
515 virus contamination in eggs. *Avian pathology: journal of the W.V.P.A* 2006; 45(1), 38–45  
516
- 517 43. Franzo G, Legnardi M, Tucciarone CM et al. Evolution of infectious bronchitis virus in the field  
518 after homologous vaccination introduction. *Vet Res.* 2019; 50, 92.

- 519 44. Wakenell P. Management and medicine of backyard poultry. Current therapy in avian medicine  
520 and surgery 2016, 550-565  
521
- 522 45. Promkuntod N. Dynamics of avian coronavirus circulation in commercial and non- commercial  
523 birds in Asia--a review. The veterinary quarterly 2016; 36(1), 30–44.  
524
- 525 46. Orakpoghenora O, Oladele SB, Abdu PA. Infectious Bursal Disease: Transmission, Pathogenesis,  
526 Pathology and Control - An Overview. World's Poultry Science Journal 2020; 76(2)  
527
- 528 47. Delmas B, Attoui H, Ghosh S, et al. ICTV virus taxonomy profile: Birnaviridae. J Gen Virol.  
529 2019;100(1):5-6. doi:10.1099/jgv.0.001185  
530
- 531 48. Dey S, Pathak DC, Ramamurthy N, Maity HK, Chellappa MM. Infectious bursal disease virus in  
532 chickens: prevalence, impact, and management strategies. Vet Med (Auckl). 2019 Aug 5;10:85-97.  
533 doi: 10.2147/VMRR.S185159. PMID: 31497527; PMCID: PMC6689097  
534
- 535 49. Mohamed MA, Elzanaty KE, Bakhit BM, Safwat MM. Genetic characterization of infectious bursal  
536 disease viruses associated with gumboro outbreaks in commercial broilers from asyut province,  
537 egypt. ISRN Vet Sci. 2014 Feb 9;2014:916412. doi: 10.1155/2014/916412. PMID: 24977049;  
538 PMCID: PMC4060563.  
539
- 540 50. Centers for Disease Control and Prevention, National Center for Immunization and Respiratory  
541 Diseases (NCIRD). Available from: <https://www.cdc.gov/flu/avianflu/avian-in-birds.htm>  
542
- 543 51. Nomaguchi M and Adachi A (2017) Editorial: Highly Mutable Animal RNA Viruses: Adaptation  
544 and Evolution. Front. Microbiol. 8:1785. doi: 10.3389/fmicb.2017.01785  
545
- 546 52. Kosik I, Yewdell JW. Influenza Hemagglutinin and Neuraminidase: Yin-Yang Proteins  
547 Coevolving to Thwart Immunity. Viruses. 2019 Apr 16;11(4):346. doi: 10.3390/v11040346.  
548 PMID: 31014029; PMCID: PMC6520700.  
549
- 550 53. Shi W, Lei F, Zhu C, Sievers F, Higgins DG. A complete analysis of HA and NA genes of influenza  
551 A viruses. PLoS One. 2010 Dec 29;5(12):e14454. doi: 10.1371/journal.pone.0014454. PMID:  
552 21209922; PMCID: PMC3012125.  
553
- 554 54. Capua I, Alexander DJ. Avian influenza infections in birds--a moving target. Influenza Other  
555 Respir Viruses. 2007 Jan;1(1):11-8. doi: 10.1111/j.1750-2659.2006.00004.x. PMID: 19459279;  
556 PMCID: PMC4634665.  
557
- 558 55. Bergervoet SA, Pritz-Verschuren SBE, Gonzales JL, Bossers A, Poen MJ, Dutta J, Khan Z, Kriti  
559 D, van Bakel H, Bouwstra R, Fouchier RAM, Beerens N. Circulation of low pathogenic avian  
560 influenza (LPAI) viruses in wild birds and poultry in the Netherlands, 2006-2016. Sci Rep. 2019  
561 Sep 23;9(1):13681. doi: 10.1038/s41598-019-50170-8. PMID: 31548582; PMCID: PMC6757041.  
562
- 563 56. Shriner SA, Root JJ. A Review of Avian Influenza A Virus Associations in Synanthropic Birds.  
564 Viruses. 2020 Oct 23;12(11):1209. doi: 10.3390/v12111209. PMID: 33114239; PMCID:  
565 PMC7690888.

- 566 57. Saba Shirvan A, Mardani K. Molecular detection of infectious bronchitis and Newcastle disease  
567 viruses in broiler chickens with respiratory signs using Duplex RT-PCR. *Vet Res Forum*. 2014  
568 Fall;5(4):319-23. PMID: 25610585; PMCID: PMC4299999.  
569
- 570 58. Kataria RS, Tiwari AK, Butchaiah G, Rai A. Sequence Analysis of VP2 Gene Hyper Variable  
571 Region of a Cell-culture Adapted Indian Classical Infectious Bursal Disease Virus of Chicken.  
572 *Journal of Applied Animal Research* 2007; 32:1, pages 49-54.  
573
- 574 59. Kahya S, Ardicli O, Eyigor A et. al Detection of *Mycoplasma gallisepticum* and *Mycoplasma*  
575 *synoviae* by Real-Time PCRs and *Mycoplasma gallisepticum*-antibody Detection by an ELISA in  
576 Chicken Breeder Flocks. *Kafkas Üniversitesi Veteriner Fakültesi Dergisi* 2015; 21(3):361-366  
577
- 578 60. Pant GR, & Selleck PW. Surveillance for Avian Influenza in Nepal 2004-2005 (Vigilancia  
579 epidemiológica para influenza aviar en Nepal durante los años 2004 y 2005). *Avian Diseases*.  
580 2007; 51(1), 352–354. <http://www.jstor.org/stable/4493224>  
581
- 582 61. National Contingency Plan for Prevention and Control of Avian Influenza in Nepal. In: World  
583 Organization for Animal Health [Internet]. Available from:  
584 [https://www.woah.org/fileadmin/Home/eng/Animal\\_Health\\_in\\_the\\_World/docs/pdf/AvianInflue](https://www.woah.org/fileadmin/Home/eng/Animal_Health_in_the_World/docs/pdf/AvianInfluenza-Nepal.pdf)  
585 [nza-Nepal.pdf](https://www.woah.org/fileadmin/Home/eng/Animal_Health_in_the_World/docs/pdf/AvianInfluenza-Nepal.pdf)  
586
- 587 62. Moosavy MH, Esmaceli S, Bagheri Amiri F, Mostafavi E, Zahraei Salehi T. Detection of  
588 *Salmonella* spp in commercial eggs in Iran. *Iran J Microbiol*. 2015 Feb;7(1):50-4. PMID:  
589 26644874; PMCID: PMC4670468.  
590
- 591 63. Humphrey TJ. Contamination of egg shell and contents with *Salmonella enteritidis*: a review. *Int*  
592 *J Food Microbiol*. 1994;21(1-2):31-40. doi:10.1016/0168-1605(94)90197-x  
593
- 594 64. Chousalkar KK, Flynn P, Sutherland M, Roberts JR, Cheetham BF. Recovery of *Salmonella* and  
595 *Escherichia coli* from commercial egg shells and effect of translucency on bacterial penetration in  
596 eggs. *Int J Food Microbiol*. 2010;142(1-2):207-213. doi:10.1016/j.ijfoodmicro.2010.06.029  
597
- 598 65. Sahin O, Kobalka P, Zhang Q. Detection and survival of *Campylobacter* in chicken eggs. *J Appl*  
599 *Microbiol*. 2003;95(5):1070-1079. doi:10.1046/j.1365-2672.2003.02083.x  
600
- 601 66. Soler P, Hernández Pezzi G, Echeíta A, Torres A, Ordóñez Banegas Pilar, Aladueña A.  
602 Surveillance of foodborne disease outbreaks associated with consumption of eggs and egg  
603 products: Spain, 2002 - 2003. *Euro Surveill*. 2005;10(24):pii=2726.  
604 <https://doi.org/10.2807/esw.10.24.02726-en>  
605
- 606 67. Egg-shell surveillance. In: USDA [Internet]. Available from: [https://www.ams.usda.gov/rules-](https://www.ams.usda.gov/rules-regulations/eggs#:~:text=The%20Egg%20Products%20Inspection%20Act,of%20consumers%20of%20these%20products)  
607 [regulations/eggs#:~:text=The%20Egg%20Products%20Inspection%20Act,of%20consumers%20](https://www.ams.usda.gov/rules-regulations/eggs#:~:text=The%20Egg%20Products%20Inspection%20Act,of%20consumers%20of%20these%20products)  
608 [of%20these%20products](https://www.ams.usda.gov/rules-regulations/eggs#:~:text=The%20Egg%20Products%20Inspection%20Act,of%20consumers%20of%20these%20products).
